# Supplementary material for: Disruption of Hepatocyte Growth Factor/c-Met Signaling Enhances Pancreatic β-Cell Death and Accelerates the Onset of Diabetes
Source: PubMed Central journal article supplement — Diabetes. 2011 Jan 21;60(2):525–36. doi: 10.2337/db09-1305 (PMC3028352; doi:10.2337/db09-1305), 2011-01-21

## ONLINE APPENDIX – SUPPLEMENTARY TABLE AND FIGURES

**SupplementaryTable 1.** Mouse primer sequences for Real-Time PCR experiments:

| <b>Gene</b>  | <b>Primer Sequence</b>                                                   |
|--------------|--------------------------------------------------------------------------|
| <i>c-met</i> | Forward-<br>5'CCTTCGAAAGCAACCATTTT<br>Reverse-<br>5'TTACTGACATACGCGGCTTG |
| HGF          | Forward-<br>5'TAGGAGCCACAAGGATCTGG<br>Reverse-<br>5'ACATGAAGCAGGAGGAGGTG |
| iNOS         | Forward-<br>5'TGAAGAAAACCCCTTGTGCT<br>Reverse-<br>5'TTGTCTCTGGGTCCTCTGGT |
| A20          | Forward-<br>5'CGAGAGAGAACCCCAGAAGA<br>Reverse-<br>5'ATGCATGAGGCAGTTTCCA  |
| Actin        | Forward-<br>5'AGCCATGTACGTAGCCATCC<br>Reverse-<br>5'CTCTCAGCTGTGGTGGTGAA |

:

**Supplementary Figure 1.** Glucose homeostasis is unchanged in adult PancMet KO mice. **(A)** Non-fasting blood glucose, **(B)** plasma insulin, **(C)** intraperitoneal glucose tolerance test and **(D)** insulin tolerance test performed in 10-12 week-old PancMet KO mice (n=10) and WT (n=10) littermates. **(E)** Total insulin content measured in 50 islet equivalents (IE, 1 IE=125 $\mu$ m diameter islet) from PancMet KO (n=6) and WT (n=6) mice. **(F)** Glucose-stimulated insulin secretion measured in isolated islets from PancMet KO and WT mice in 30min static incubations. Results are means $\pm$ SE of 4 experiments in triplicate. Islets were isolated from 4 mice per group. No significant differences were found between both types of mice in any of these parameters, although a trend in PancMet KO mice to display lower non-fasting blood glucose was observed [p=0.093 in (A) and p=0.070 in (D)].

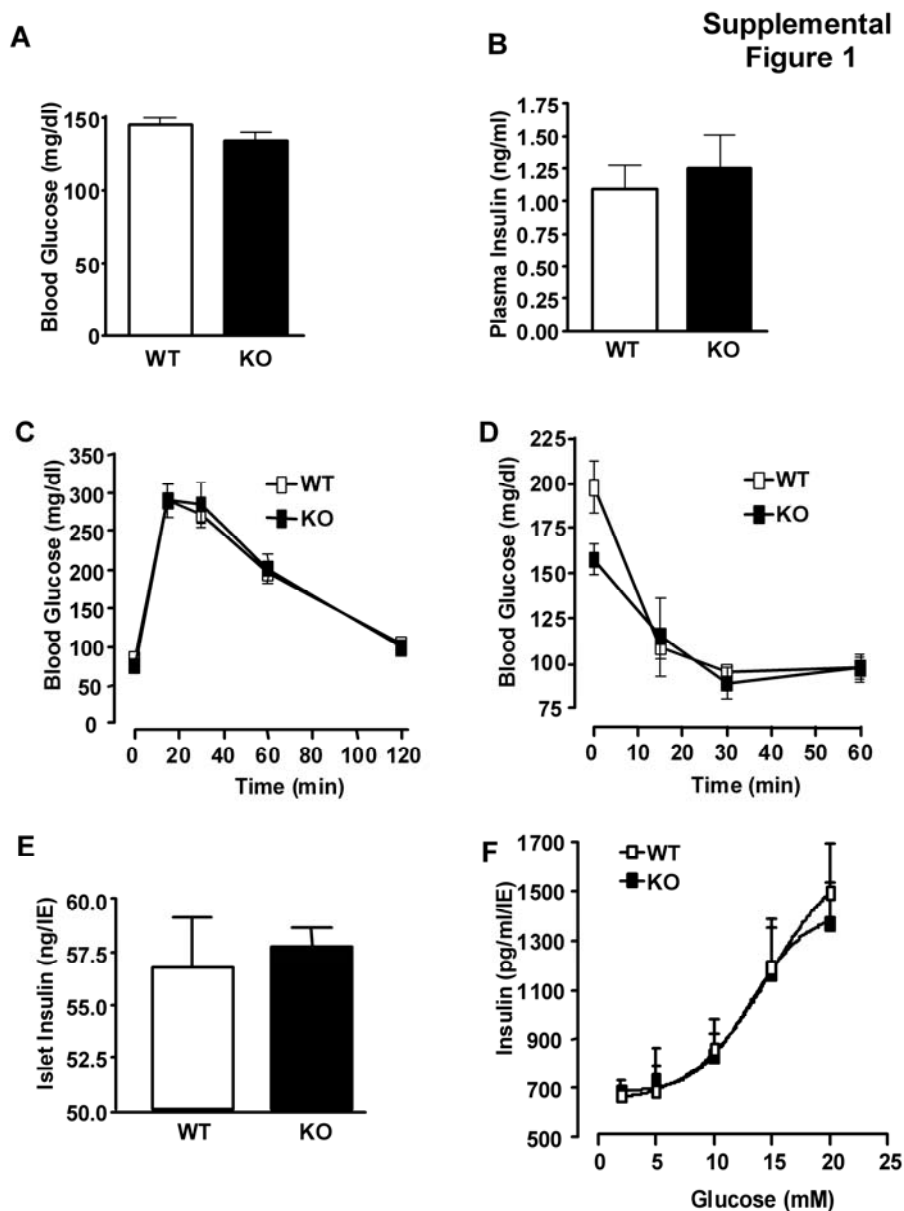

**Supplementary Figure 2.** Beta cell homeostasis is unchanged in adult PancMet KO mice. **(A-B)** Representative photomicrographs of pancreatic sections of PancMet KO and WT mice stained for insulin (brown). Scale bar=200 $\mu$ m. **(C)** Beta cell mass, **(D)** pancreatic weight, **(E)** pancreatic insulin content, and **(F)** islet number per pancreatic area in PancMet KO (n=6) and WT (n=6) mice. **(G)** Beta and **(H)** ductal cell proliferation in PancMet KO (n=6) and WT (n=6) littermates assessed by BrdU and insulin staining of pancreatic sections obtained from these mice. **(I)** Alpha cell/beta cell and **(J)** delta cell/beta cell ratios per islet were measured in pancreatic sections from PancMet KO (n=6) and WT (n=6) littermates stained for glucagon and insulin or somatostatin and insulin.

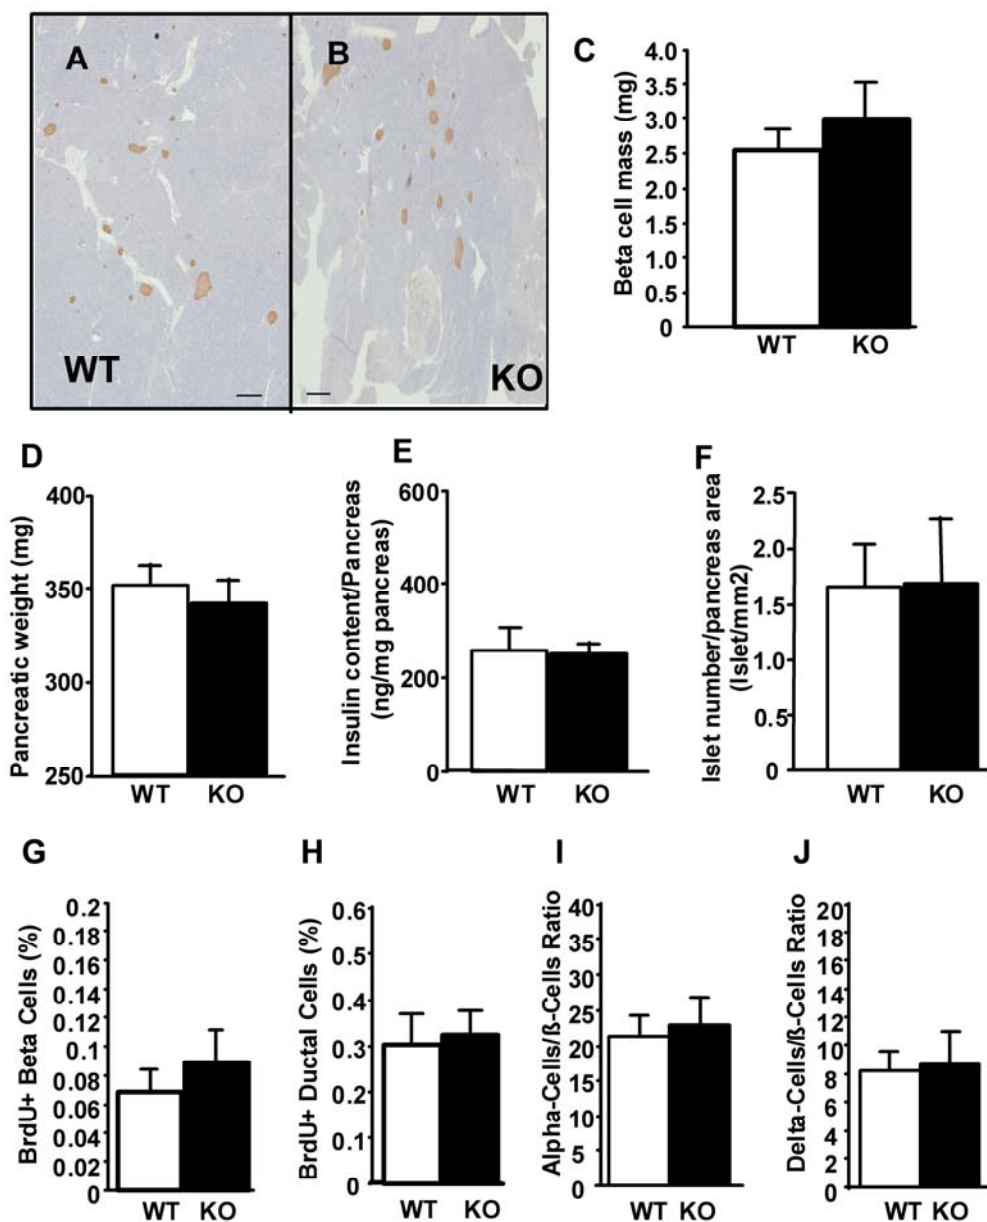

**Supplementary Figure 3. (A-C)** Insulin, **(D-F)** glucagon, **(G-I)** somatostatin and c-met co-staining in mouse islets. Representative microphotographs of islets in pancreas sections of WT mice stained for islet hormones (green) and c-met (red). Merge of both images (yellow) reveals co-localization of c-met and islet hormones in the islet. Scale Bar=25 $\mu$ m.

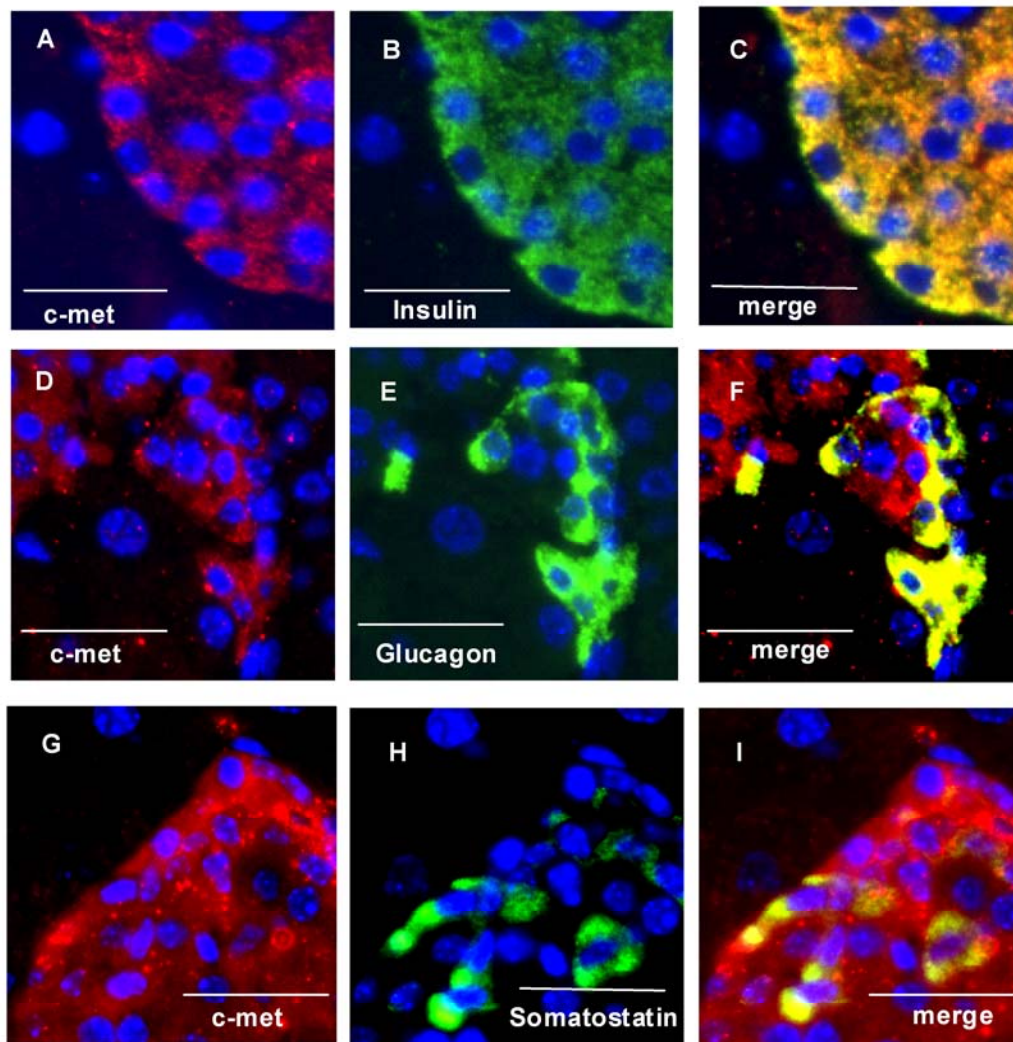

**Supplementary Figure 4.** Islet number and neogenesis are not significantly different in PancMet KO mice compared to WT littermates following treatment with MLDS. **(A)** Islet number, and **(B)** singlet and doublet insulin-positive cells in the pancreas as a potential marker for beta cell neogenesis, were measured per unit of pancreatic area in sections from PancMet KO (n=5) and WT (n=10) littermates 20 days after MLDS.

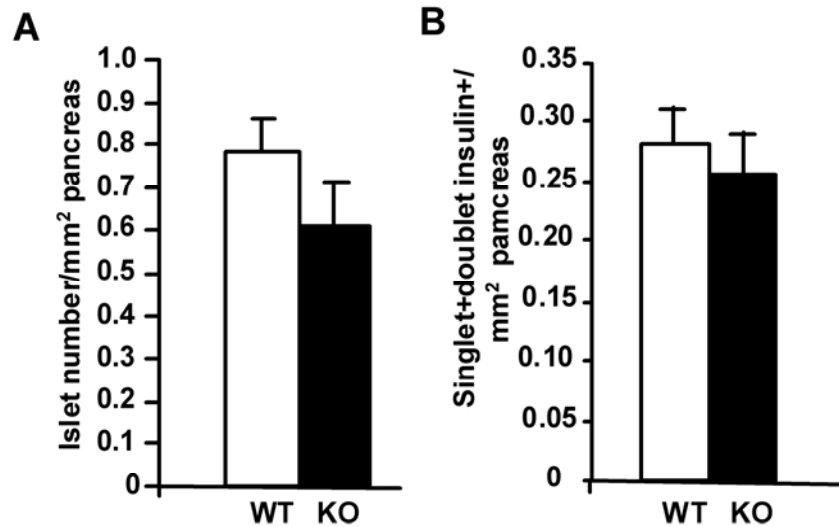

**Supplementary Figure 5. (A)** Effect of the NF- $\kappa$ B activation inhibitor SN-50 (50 $\mu$ g/ml) in beta cell death induced by 1mM STZ in WT and PancMet KO beta cells, assessed as in Fig. 6A-D. Three experiments were performed in duplicate and results are means $\pm$ SE. \*P<0.05 vs untreated, ^P<0.05 vs WT and #P<0.05 vs WT treated with cytokines alone. **(B)** Effect of the Fas agonist Jo-2 in beta cell death in primary cell cultures from WT and PancMet KO mouse islets. Cells were treated with 50U/ml IL-1 $\beta$ , 1000U/ml TNF- $\alpha$  and 1000U/ml IFN- $\gamma$  for 12h and then 0.2 $\mu$ g/ml Jo-2 (BD-Pharmingen, Franklin Lakes, NJ) was added for an additional 12h period. Four experiments were performed in duplicate and results are means $\pm$ SE. \*P<0.05 vs untreated. No significant differences were found between treated WT and PancMet KO beta cells.

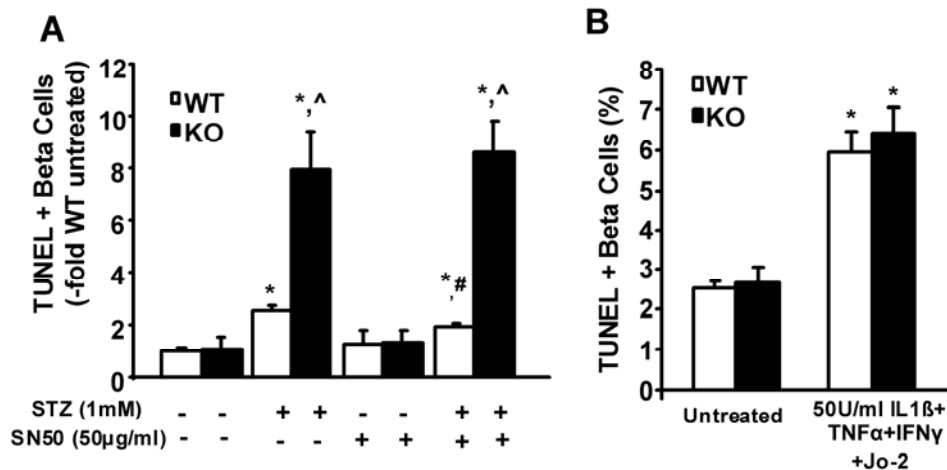

**Supplementary Figure 6.** HGF does not protect PancMet KO mouse beta cells against cytokine-induced cell death. Quantitation of TUNEL-positive beta cell nuclei in four experiments performed in duplicate in WT and PancMet KO islet cell cultures treated with or without 25ng/ml HGF and 50U/ml IL-1 $\beta$ , 1000U/ml TNF- $\alpha$  and 1000U/ml IFN- $\gamma$  for 24h. Results are means $\pm$ SE. \*P<0.05 vs untreated ^P<0.05 vs WT and #P<0.05 vs WT treated with cytokines alone.

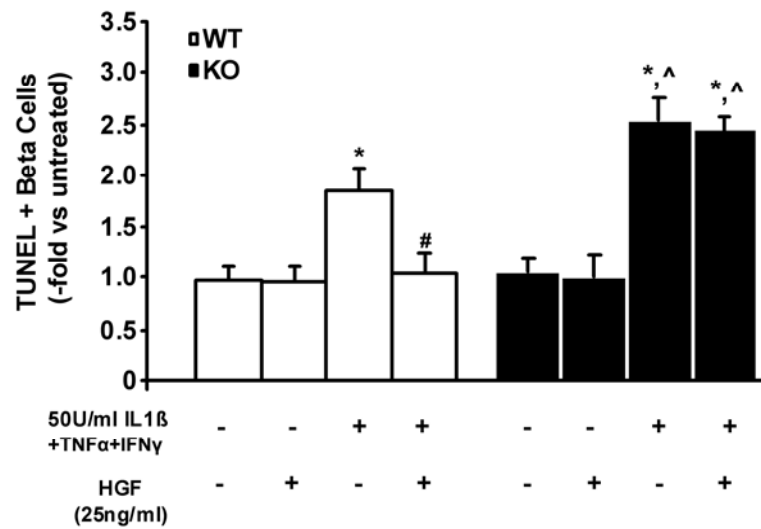

Supplement: supp_db09-1305_DB091305SupplementaryData.pdf [file supp_db09-1305_DB091305SupplementaryData.pdf]
